# Supplementary material for: Ethnic differences between South Asians and white Caucasians in cardiovascular disease-related mortality in developed countries: a systematic literature review protocol
Source: HighWire-hosted journal article supplement (doi:10.1136/bmjopen-2021-052487), 2022-07-01
Supplement: bmjopen-2021-052487supp001_data_supplement.pdf [file bmjopen-2021-052487supp001_data_supplement.pdf]

**Appendix 1: List of abbreviations**

|             |                                                                                                         |
|-------------|---------------------------------------------------------------------------------------------------------|
| CVD         | Cardiovascular disease                                                                                  |
| SLR         | Systematic literature review                                                                            |
| AHA         | American Heart Association                                                                              |
| CALIBER     | Randomized Controlled Trial of LINX Versus Double-Dose Proton Pump Inhibitor Therapy for Reflux Disease |
| IPD         | Individual patient data                                                                                 |
| MEDC        | More economically developed countries                                                                   |
| NHS England | National Health Service England                                                                         |
| PICO        | Population, intervention, control, and outcomes criteria                                                |
| PRISMA      | Preferred Reporting Items for Systematic Reviews and Meta-Analyses                                      |
| PROSPERO    | International prospective register of systematic reviews                                                |
| PURE        | Prospective Urban Rural Epidemiology                                                                    |
| QUIPS       | Quality in prognosis studies                                                                            |
| REACH       | Resilience, Ethnicity and AdolesCent mental Health                                                      |
| RoB         | Risk of bias                                                                                            |
| UK          | United Kingdom                                                                                          |
| USA         | United States of America                                                                                |
